# Supplementary material
Source: PubMed Central journal article supplement (PMC7213787)
Supplement: jciinsight-5-129034-s161.pdf [file jciinsight-5-129034-s161.pdf]

**Fig. S 1**

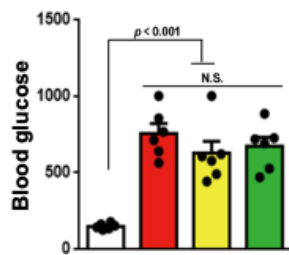

**Supplementary Fig 1. Short-term intervention of empagliflozin failed to alter the blood glucose. For each group N=6.**

**Fig. S 2**

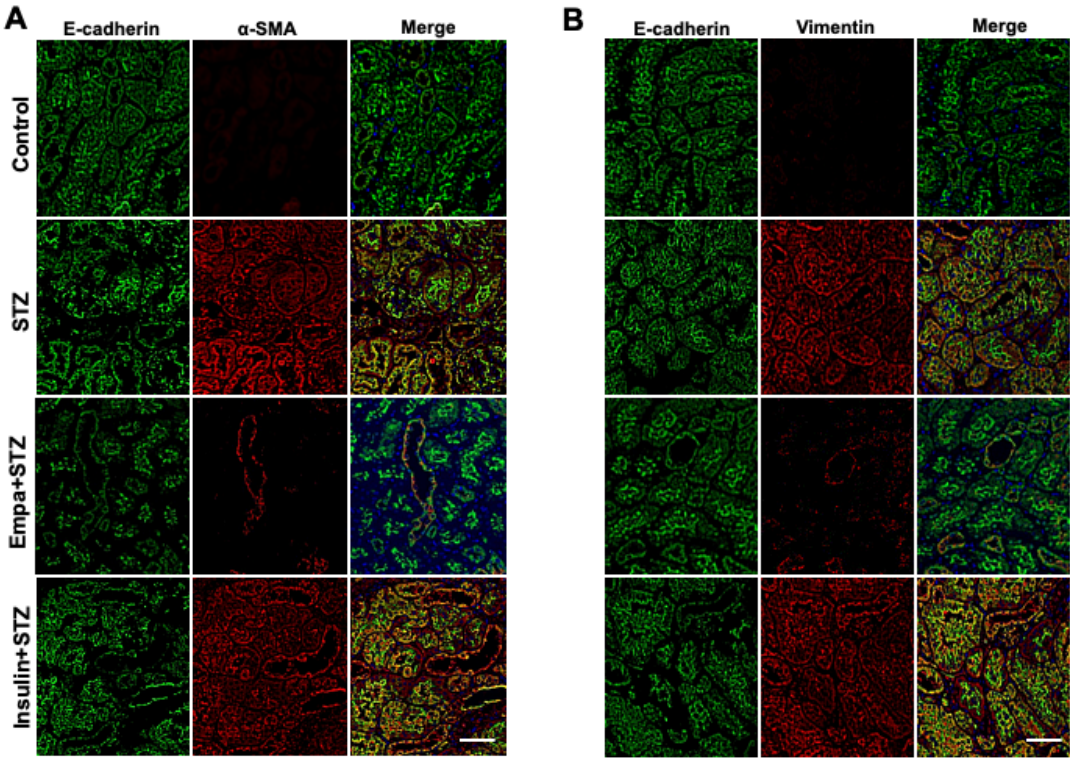

Supplementary Fig 2 Each color images of Figure 2.

**Fig. S 3**

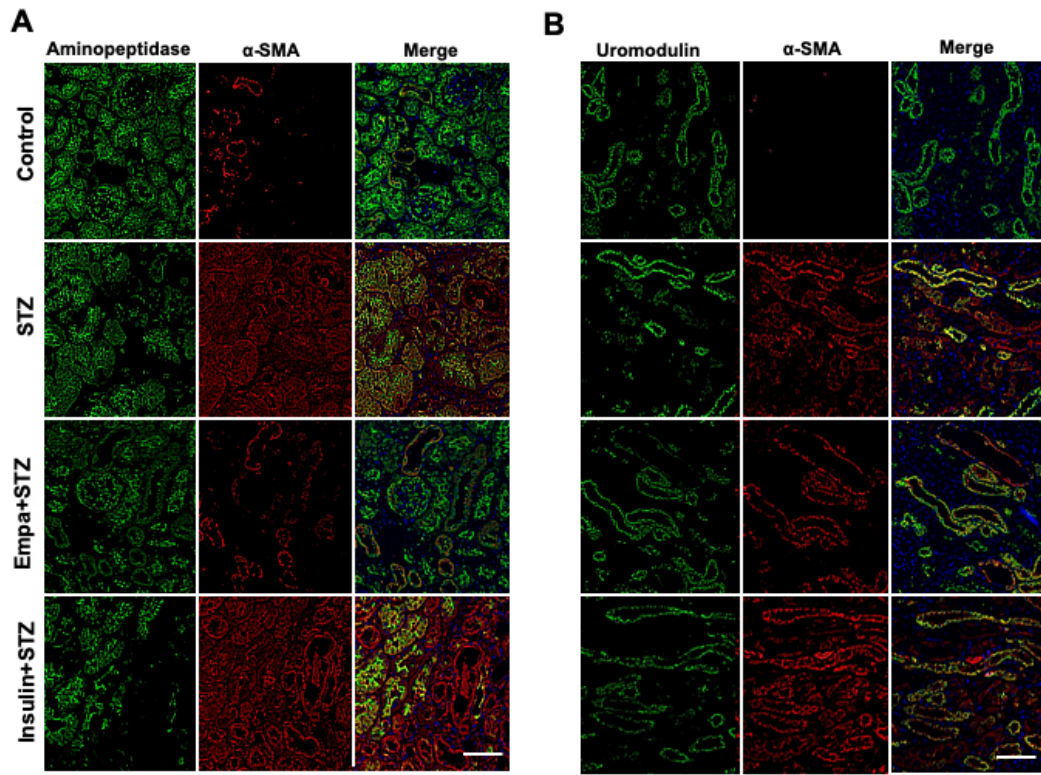

Supplementary Fig 3. Each color images of Figure 2.

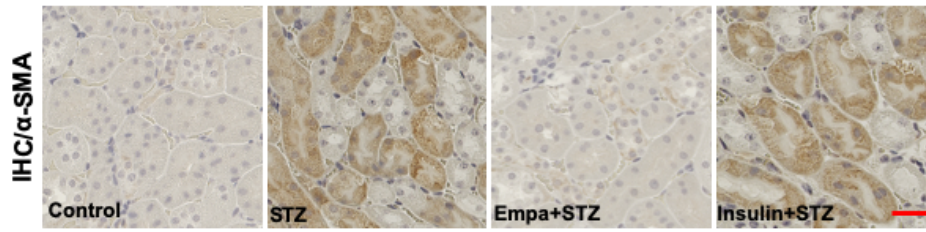

**Supplementary Fig 4.** Immunohistochemical analysis for  $\alpha$ -SMA. Deparaffinized sections were analyzed from each group of mice. N=5. Scale bar: 60  $\mu$ m.

**Fig. S 5**

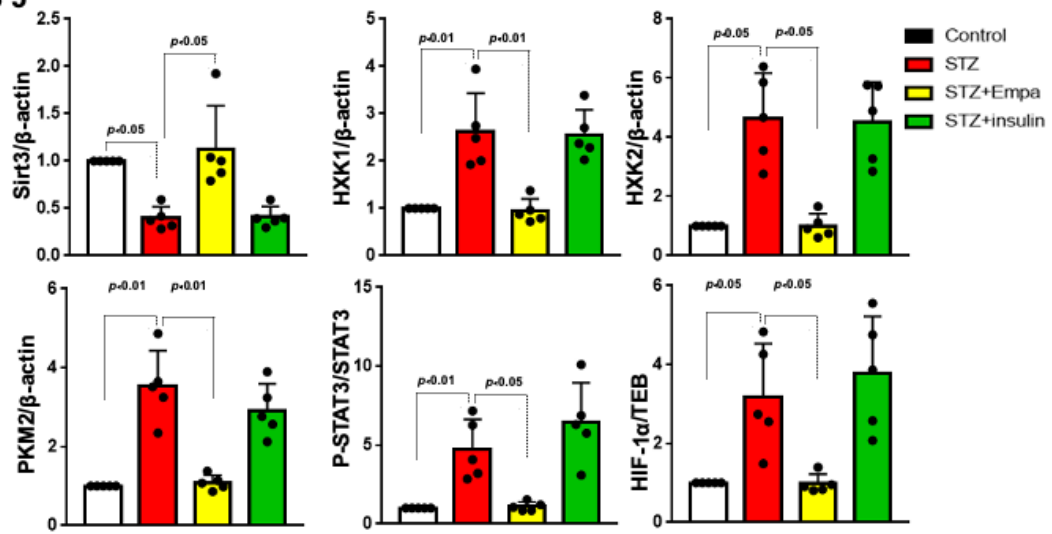

**Supplementary Fig 5. Quantification of the western blotting images from Fig 4.** Representative western blots analysis data for Sirt3, P-STAT3 and aberrant glycolysis-associated molecules from five independent experiments. Densitometric analysis of the indicated molecules. The data are expressed as the mean  $\pm$  s.e.m in the graph. One-way analysis of variance followed by Tukey's multiple comparison test was used to determine significance, which was defined as  $P < 0.05$ . Empagliflozin was designated as Empa in the figure.

**Fig. S 6**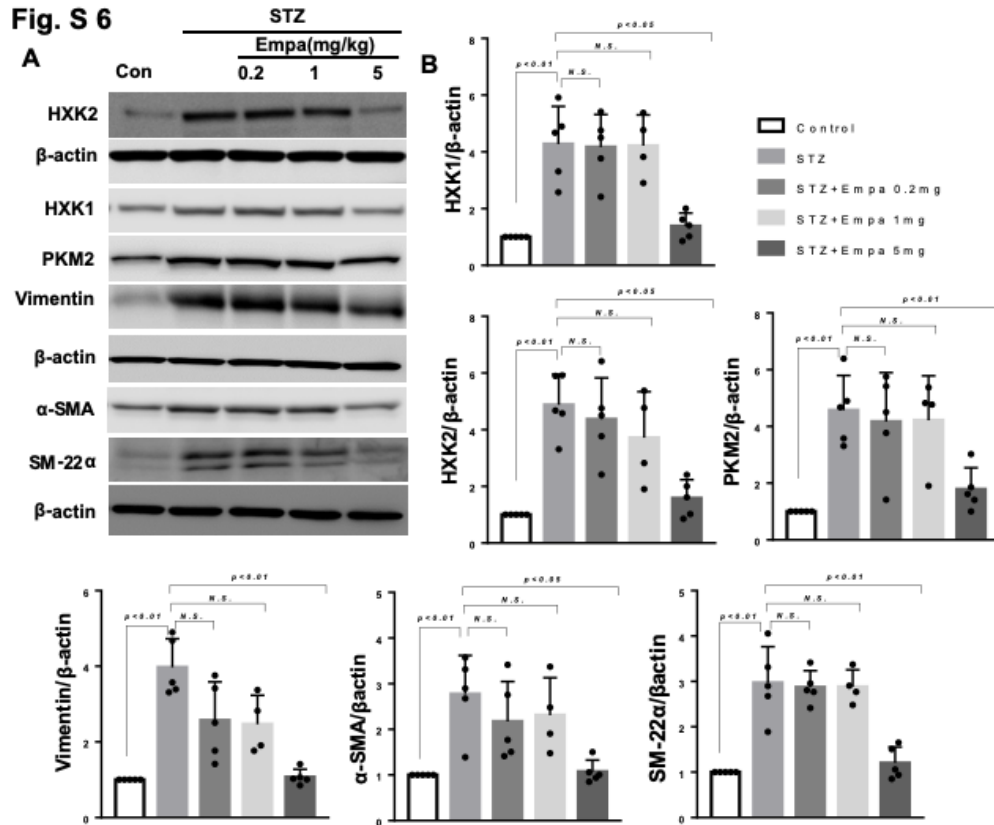

**Supplementary Fig 6: Empagliflozin suppressed the kidney fibrosis on dose-dependent in diabetic CD-1 mice.** (A, B) Western blotting analysis of the mesenchymal and glycolysis markers in the kidney tissues. Densitometric analysis of the indicated molecules. N=5. The data are expressed as the mean  $\pm$  s.e.m.  $\beta$ -actin from same gel are shown under the corresponding blots as loading control. One-way analysis of variance followed by Tukey's multiple comparison test was used to determine significance, which was defined as  $P < 0.05$ . Empagliflozin was designated as Empa in the Figure.

**Fig. S 7**

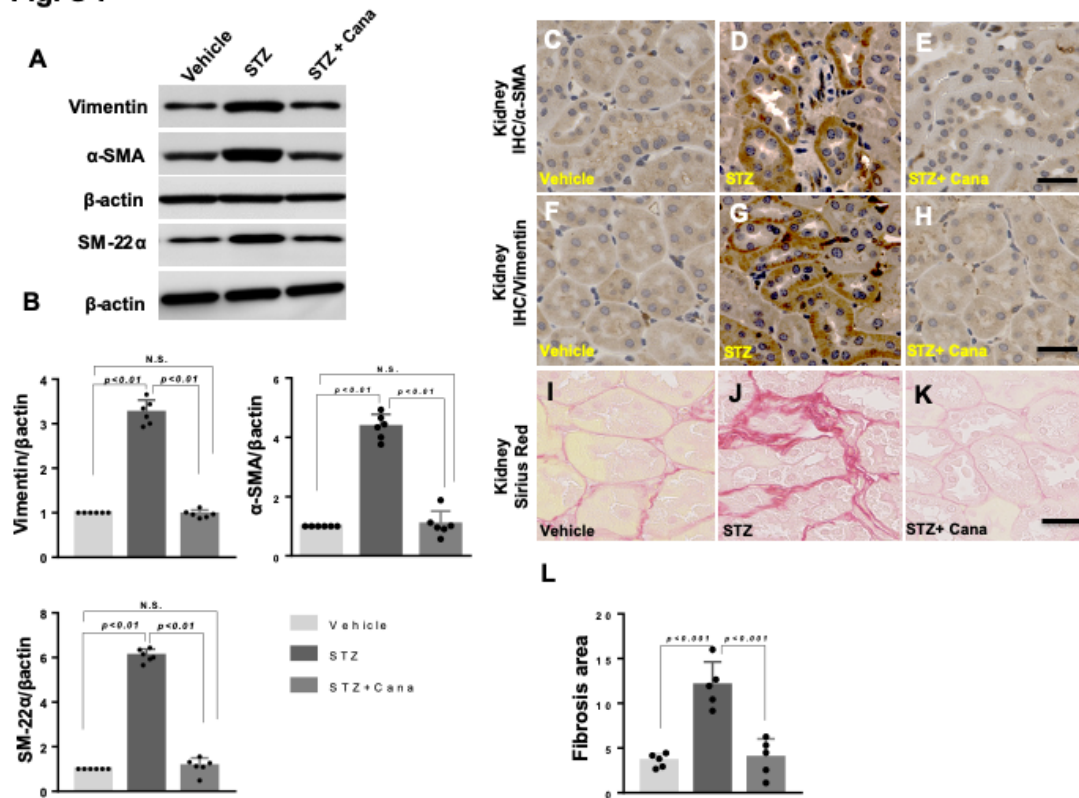

**Supplementary Fig 7: Canagliflozin suppressed the kidney fibrosis associated with inhibition of the EMT program in diabetic kidney.** (A, B) western blotting analysis of the mesenchymal markers in kidney samples.  $\beta$ -actin from same gel are shown under the corresponding blots as loading control. Densitometric analysis of the indicated molecules. N=5. (C-H) Immunohistochemical analysis for  $\alpha$ -SMA and vimentin. Deparaffinized sections were analyzed from each group of mice. N=5. Scale bar: 50  $\mu$ m. Representative data are shown. Higher magnification (x300) (I-K) images of Sirius Red staining for fibrosis, scale bar 60  $\mu$ m. (L) Relative fibrosis areas were calculated using the ImageJ software. Five independent high magnification images of the staining were analyzed. N=5. The data are expressed as the mean  $\pm$  s.e.m. One-way analysis of variance followed by Tukey's multiple comparison test was used to determine significance, which was defined as  $P < 0.05$ . Empagliflozin was designated as Empa in the Figure.

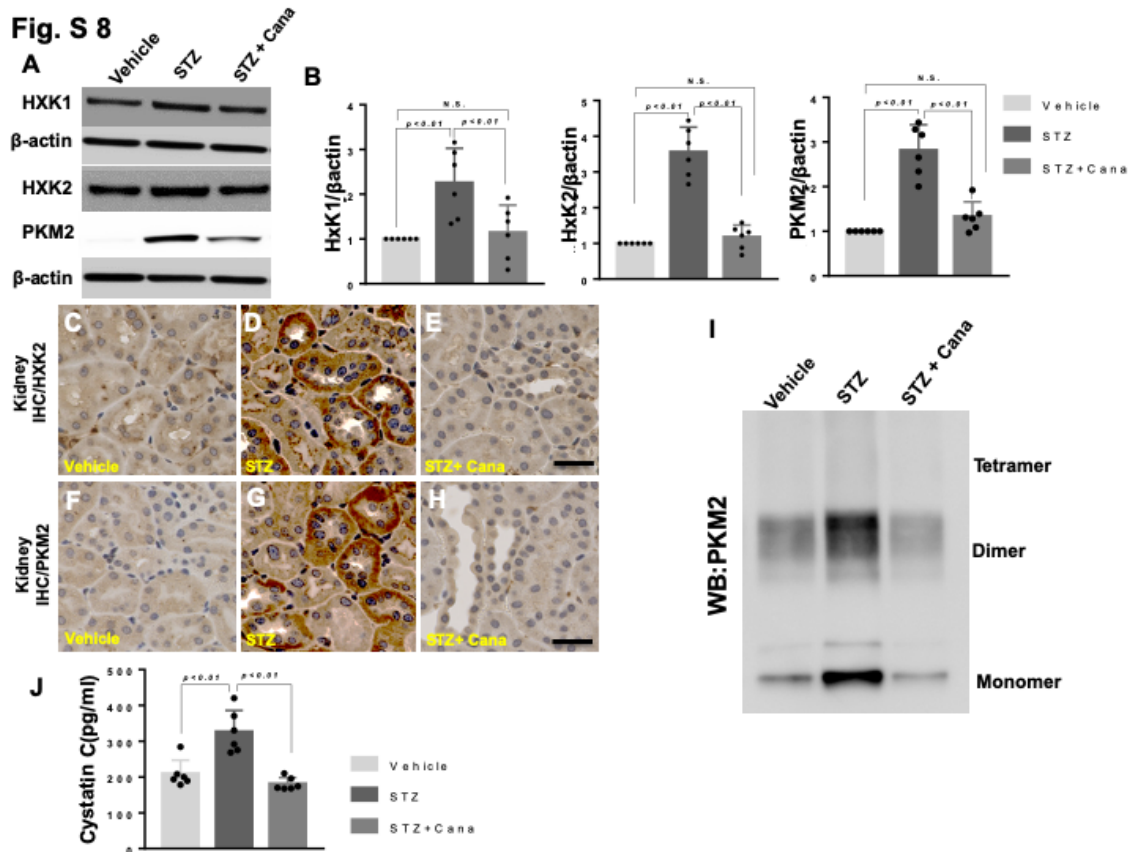

**Supplementary Fig 8: Canagliflozin inhibited aberrant glycolysis in the diabetic kidney. (A, B)** western blotting analysis of the glycolysis markers in the kidney samples. Densitometric analysis of the indicated molecules.  $\beta$ -actin from same gel are shown under the corresponding blots as loading control. N=5. **(C-H)** Immunohistochemical analysis for HxK2 and PKM2. Deparaffinized sections were analyzed from each group of mice. N=5. Scale bar: 40  $\mu$ m. **(I)** Chemical crosslinking analysis of PKM2. Kidney lysates were treated with glutaraldehyde and separated in gels. Representative analysis from five independent experiments is shown. **(J)** plasma cystatin C was shown, N=6. The data are expressed as the mean  $\pm$  s.e.m in the graph. One-way analysis of variance followed by Tukey's multiple comparison test was used to determine significance, which was defined as  $P < 0.05$ . Empagliflozin was designated as Empa in the Figure.



**Fig. S 9**

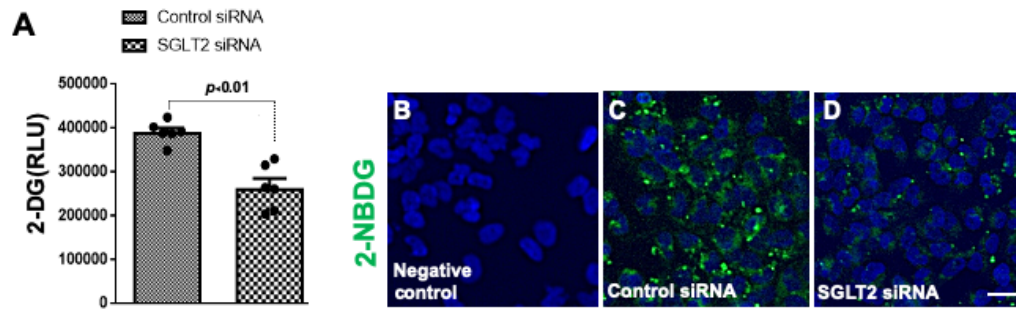

**Supplementary Fig 9. SGLT2 knockdown decreased the glucose uptake in HK2 cells.**

The HK2 cells were transfected by SGLT2 or scramble siRNA for 48 hour. **(A)** Elisa assay analysis of 2-DG in cultured HK2 cells. N=6. **(B-D)** Immunofluorescence analysis of 2-NBDG. For each slide, images of six different fields of view were evaluated. The scale bar is 50  $\mu$ m in each panel.

**Fig. S 10**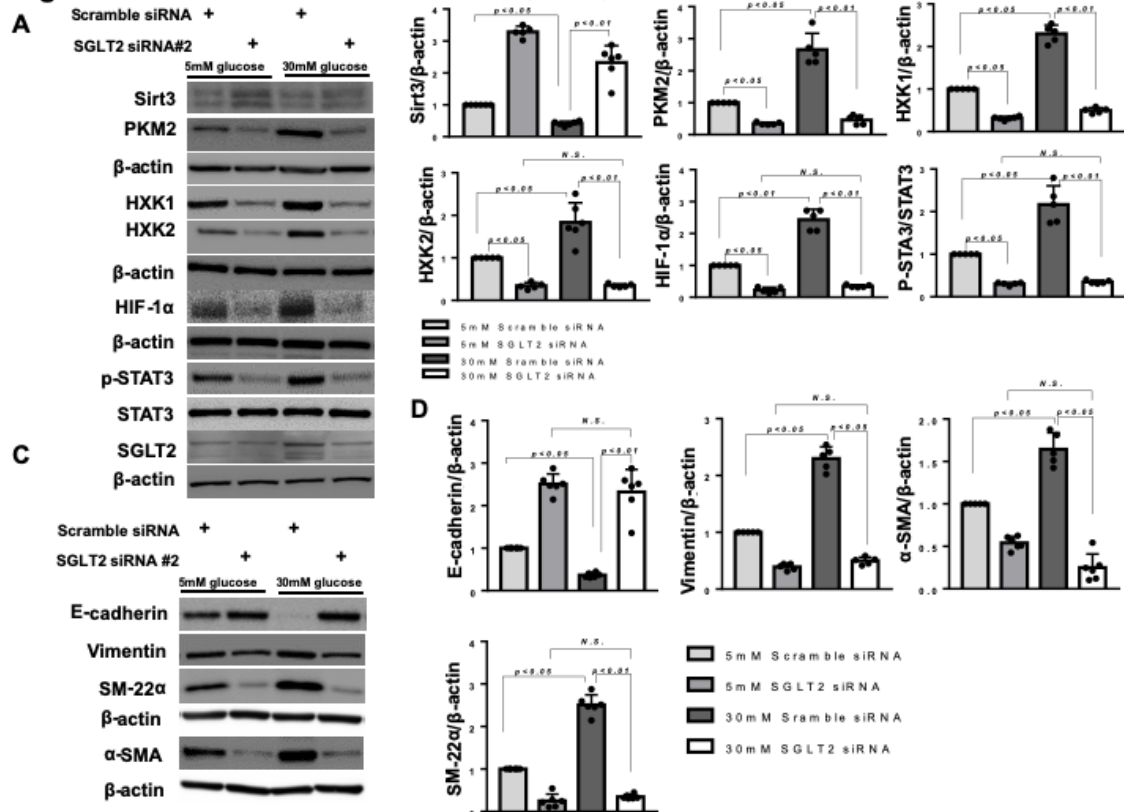

**Supplementary Fig 10: SGLT2 siRNA#2 protected HK2 cells against high glucose-induced EMT associated with suppression of aberrant glycolysis. (A)** Representative western blotting analysis data for Sirt3, P-STAT3 and the molecules relevant for aberrant glycolysis from five independent experiments.  $\beta$ -actin from same gel are shown under the corresponding blots as loading control. T-STAT3 was analyzed in different gels using same samples as P-STAT3. **(B)** Densitometric analysis of the indicated molecules. N=5. **(C)** Representative western blot analysis data for the EMT from five independent experiments.  $\beta$ -actin from same gel are shown under the corresponding blots as loading control except for E-cadherin for which  $\beta$ -actin was run in different gel using same samples. **(D)** Densitometric analyses of the indicated molecules. N=5. The data are expressed as the mean  $\pm$  s.e.m in the graph. One-way analysis of variance followed by Tukey's multiple comparison test was used to determine significance, which was defined as  $P < 0.05$ .

**Fig. S 11**

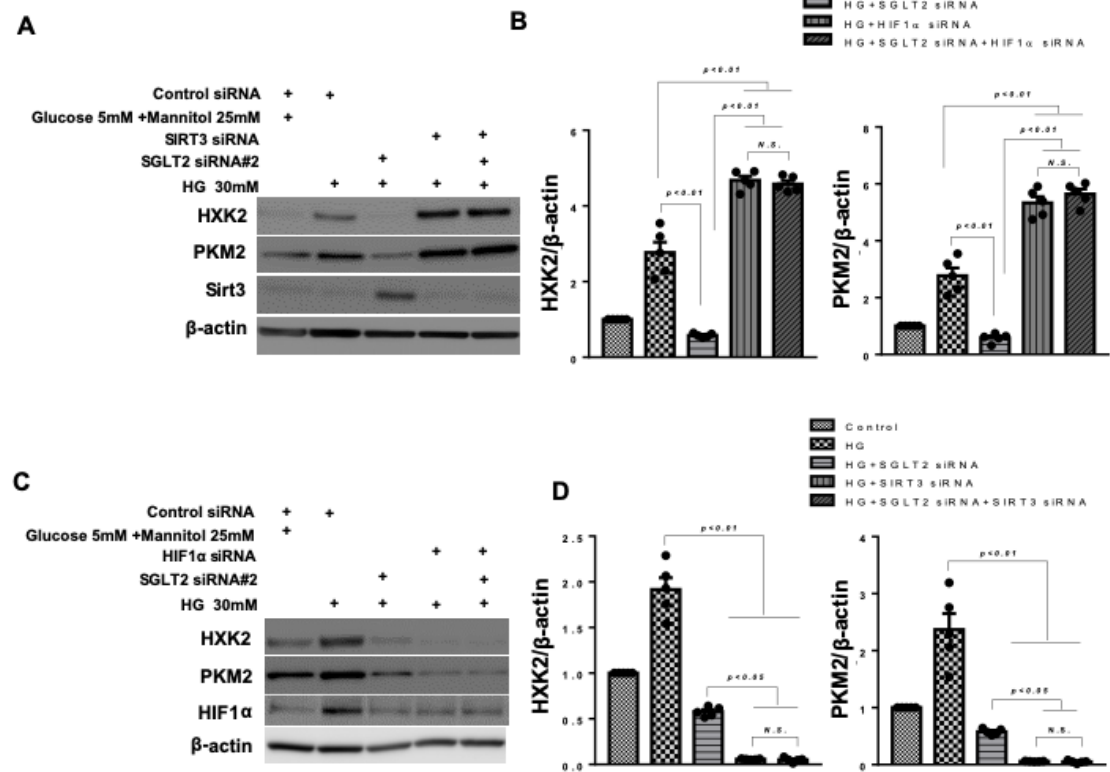

**Supplementary Fig 11. SGLT2 siRNA#2 suppressed the aberrant glycolysis depended on SIRT3 pathway.** The SGLT2 siRNA#2 with or without Sirt3 or HIF1α siRNA were transfected into HK2 cells, after 6 hours, changed the fresh medium with high glucose incubation for 48 hours. (A-D) Western blotting analysis of glycolysis markers. Representative analysis from five independent experiments is shown. β-actin from same gel are shown under the corresponding blots as loading control. The data were normalized to β-actin and are shown as the mean ± s.e.m. One-way analysis of variance followed by Tukey's multiple comparison test was used to determine significance, which was defined as P<0.05.

**Fig. S 12**

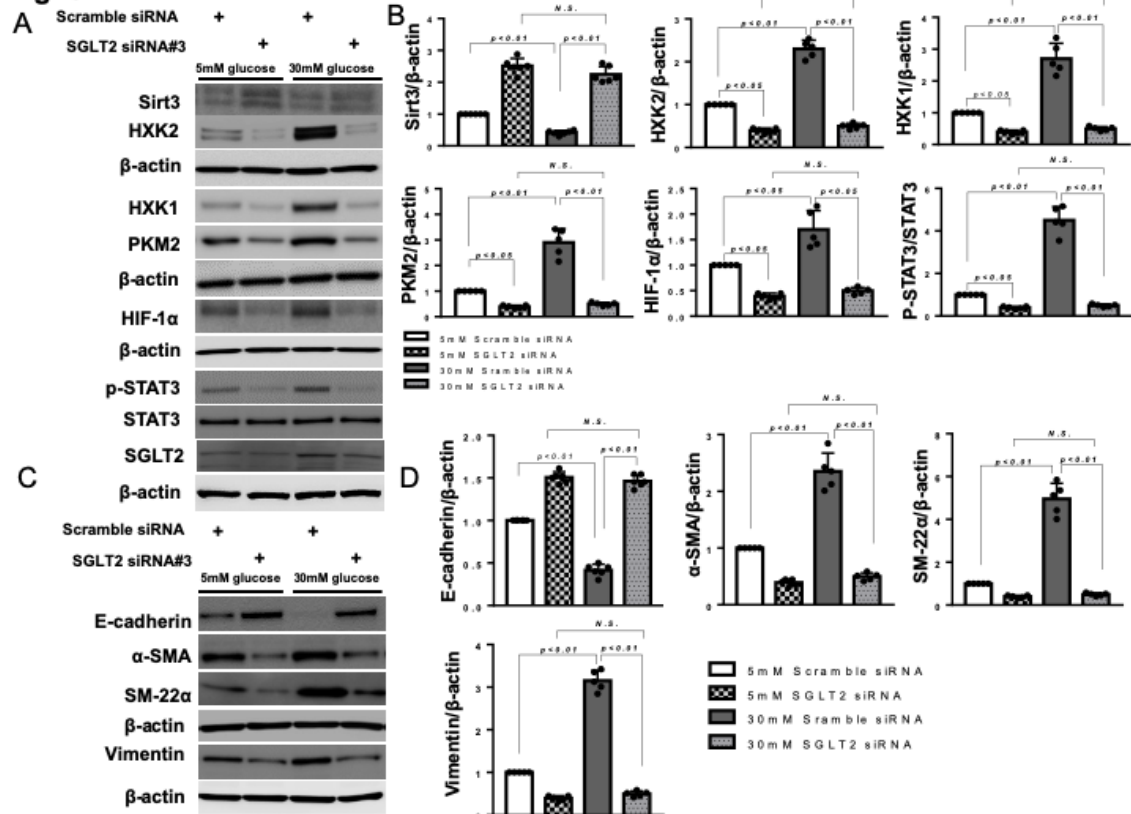

**Supplementary Fig 12: SGLT2 siRNA#3 protected HK2 cells against high glucose-induced EMT associated with suppression of aberrant glycolysis. (A)** Representative western blotting analysis data for Sirt3, P-STAT3 and the molecules relevant for aberrant glycolysis from five independent experiments.  $\beta$ -actin from same gel are shown under the corresponding blots as loading control. **(B)** Densitometric analysis of the indicated molecules. N=5. **(C)** Representative western blot analysis data for the EMT from five independent experiments.  $\beta$ -actin from same gel are shown under the corresponding blots as loading control. **(D)** Densitometric analyses of the indicated molecules. N=5. The data are expressed as the mean  $\pm$  s.e.m in the graph. One-way analysis of variance followed by Tukey's multiple comparison test was used to determine significance, which was defined as  $P < 0.05$ .

**Fig. S 13**

**A**

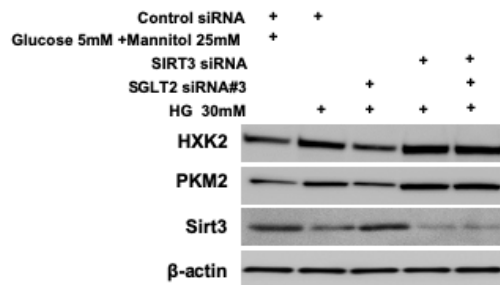

**B**

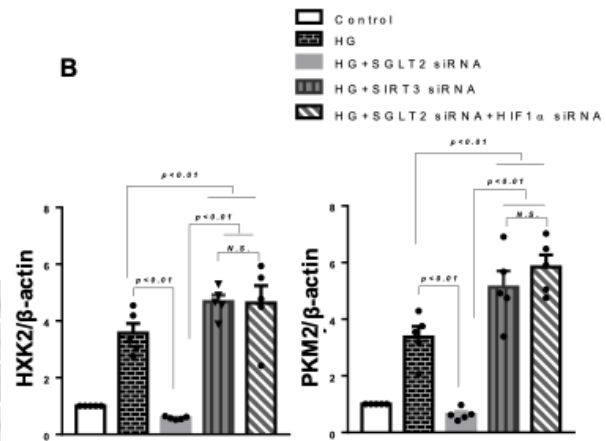

**C**

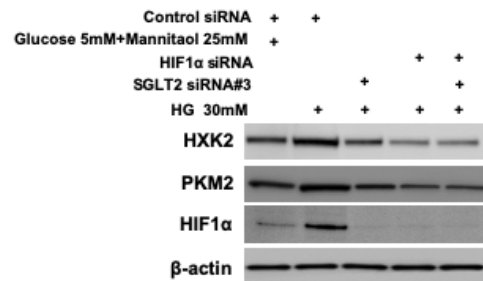

**D**

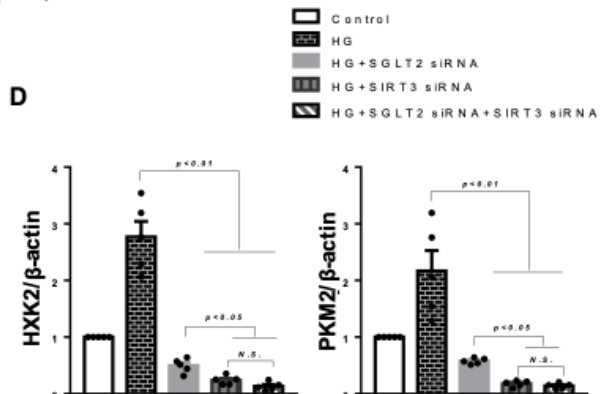

**Supplementary Fig 13. SGLT2 siRNA#3 suppressed the aberrant glycolysis depended on SIRT3 pathway.** The SGLT2 siRNA#3 with or without Sirt3 or HIF1α siRNA were transfected into HK2 cells, after 6 hours, changed the fresh medium with high glucose incubation for 48 hours. (A-D) Western blotting analysis of glycolysis markers. Representative analysis from five independent experiments is shown.  $\beta$ -actin from same gel are shown under the corresponding blots as loading control. The data were normalized to  $\beta$ -actin and are shown as the mean  $\pm$  s.e.m. One-way analysis of variance followed by Tukey's multiple comparison test was used to determine significance, which was defined as  $P < 0.05$ .

**Fig. S 14**

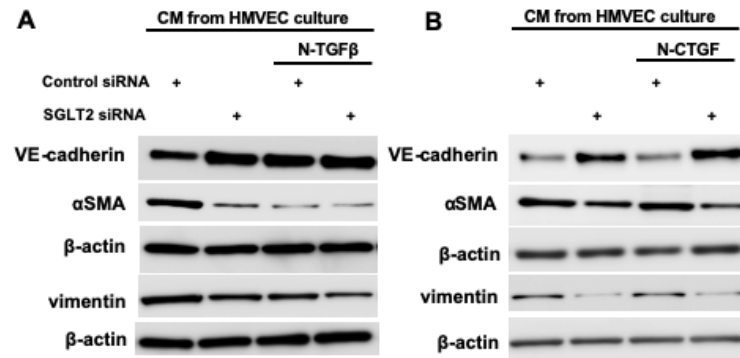

**Supplementary Fig 14. The conditioned medium from EMT induction led to EndMT depended on TGF $\beta$  pathway.** Design of the conditioned media (CM) experiment. The HK2 cells were transfected by SGLT2 or scramble siRNA. After 48 hours, HMVEC was incubated into CM with or without neutralizing TGF $\beta$  or CTGF antibody treatment. (A, B) Western blot analysis of VE-cadherin,  $\alpha$ SMA and vimentin.  $\beta$ -actin from same gel are shown under the corresponding blots as loading control.

Fig. S 15

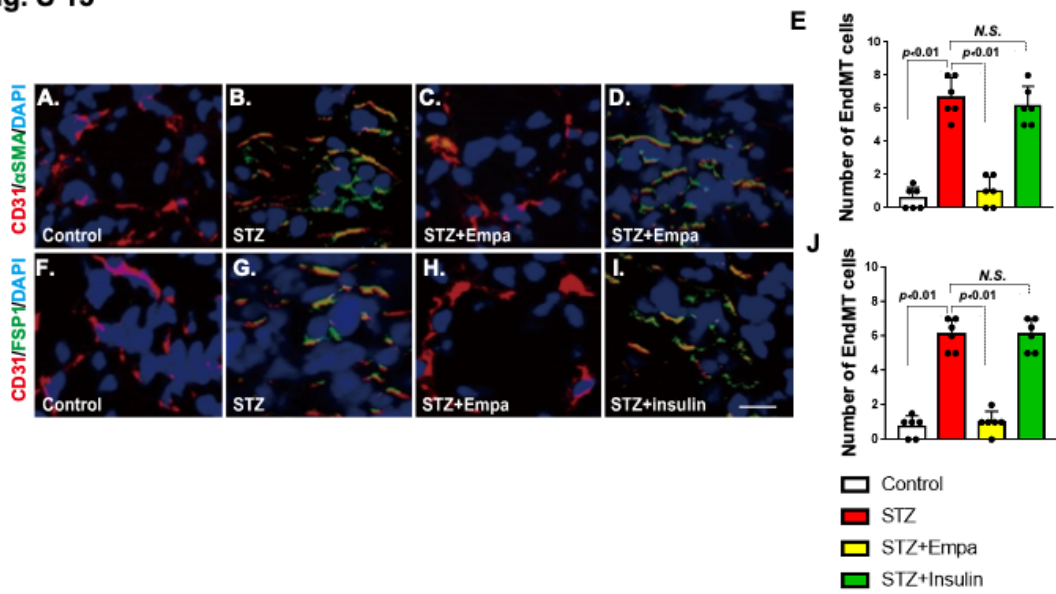

**Supplementary Fig 15. Empagliflozin suppressed the EndMT induction in diabetic kidney.** (A-J) EndMT analysis. CD31 and  $\alpha$ SMA double-positive (A-D) and CD31 and FSP1 double-positive (F-I) cells were recognized as the cells undergoing the EndMT. (E, J) The cells undergoing the EndMT were counted and quantified in 6 different fields in each sample for 5 mice from each group. Scale bar: 50um. Empagliflozin was designated as Empa in the figure

**Fig. S 16**

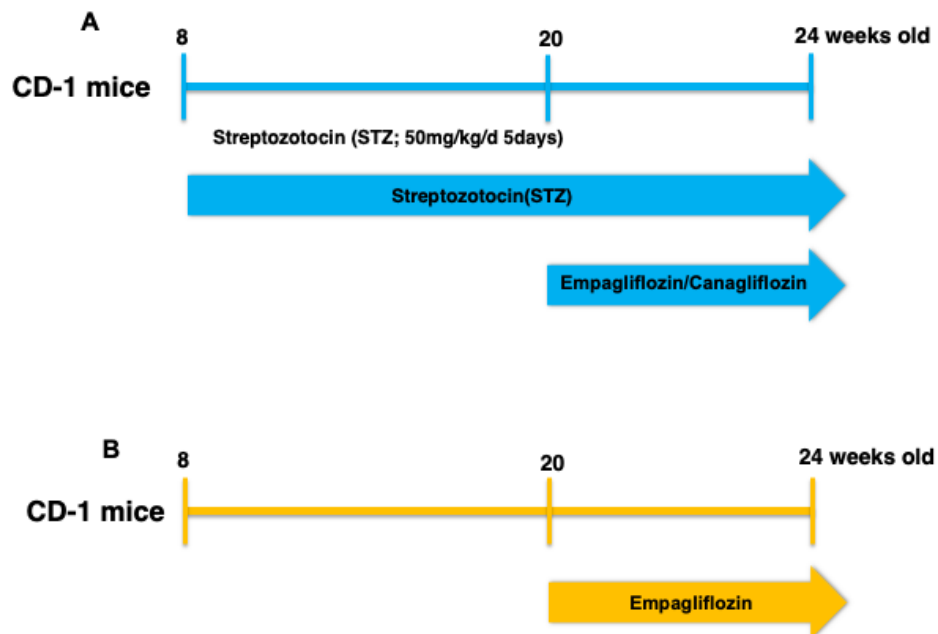

**Supplementary Fig 16. Scheme of animal experiments.** A. CD-1 Diabetic mice were respectively treated with (empagliflozin [0.2, 1, 5 mg/kg BW/day], canagliflozin [30 mg/kg BW/day], placebo [methylcellulose], or insulin pellets) for one month. B. CD-1 control mice were treated with empagliflozin (5 mg/kg BW/day) for one month.
